# Supplementary material for: 2D Nanostructured MXene-Based Silver Nanoparticles for Photocatalytic Degradation of Safranin Dye
Source: MDPI journal article supplement (doi:10.3390/catal14030201), 2024-03-19
Supplement: s1 [file s1]

## Supporting Information

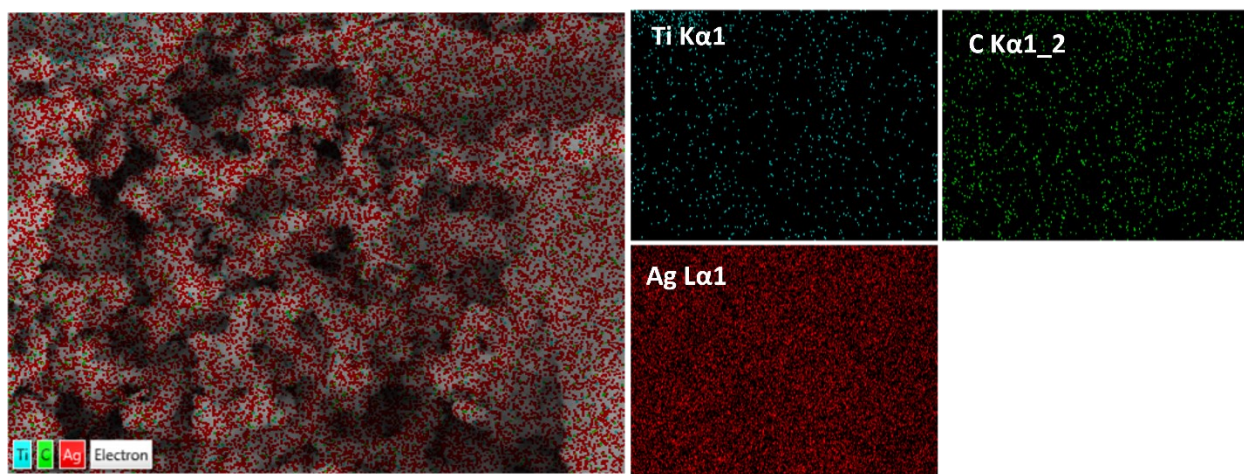

**Fig. S1** Elemental mapping of showing the homogenous distribution of Ag, Ti and C elements

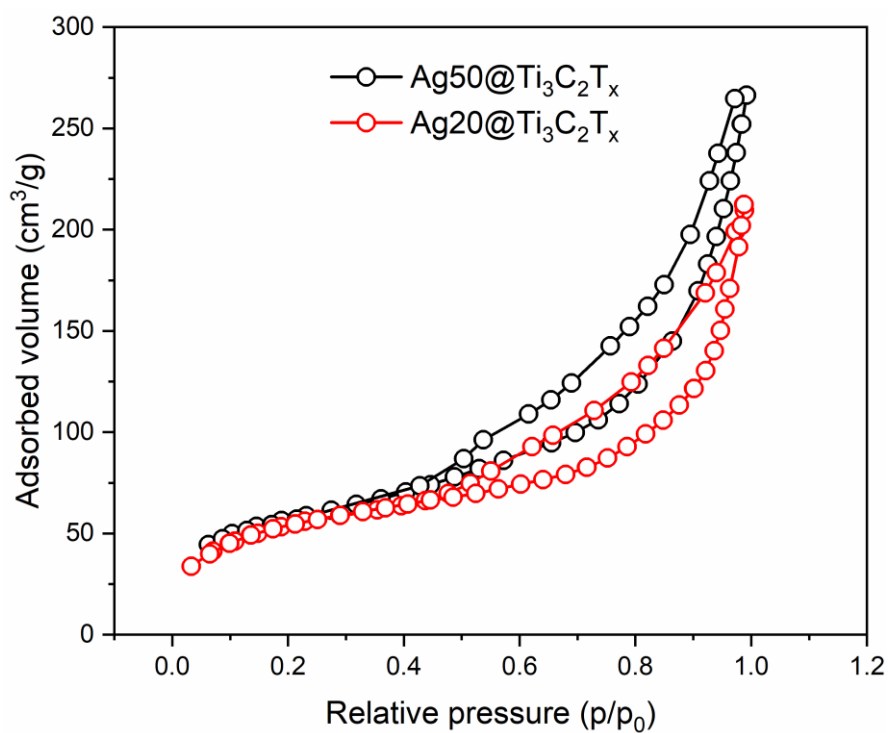

**Fig. S2** BET surface area of Ag20@Ti<sub>3</sub>C<sub>2</sub>T<sub>x</sub> and Ag50@Ti<sub>3</sub>C<sub>2</sub>T<sub>x</sub>

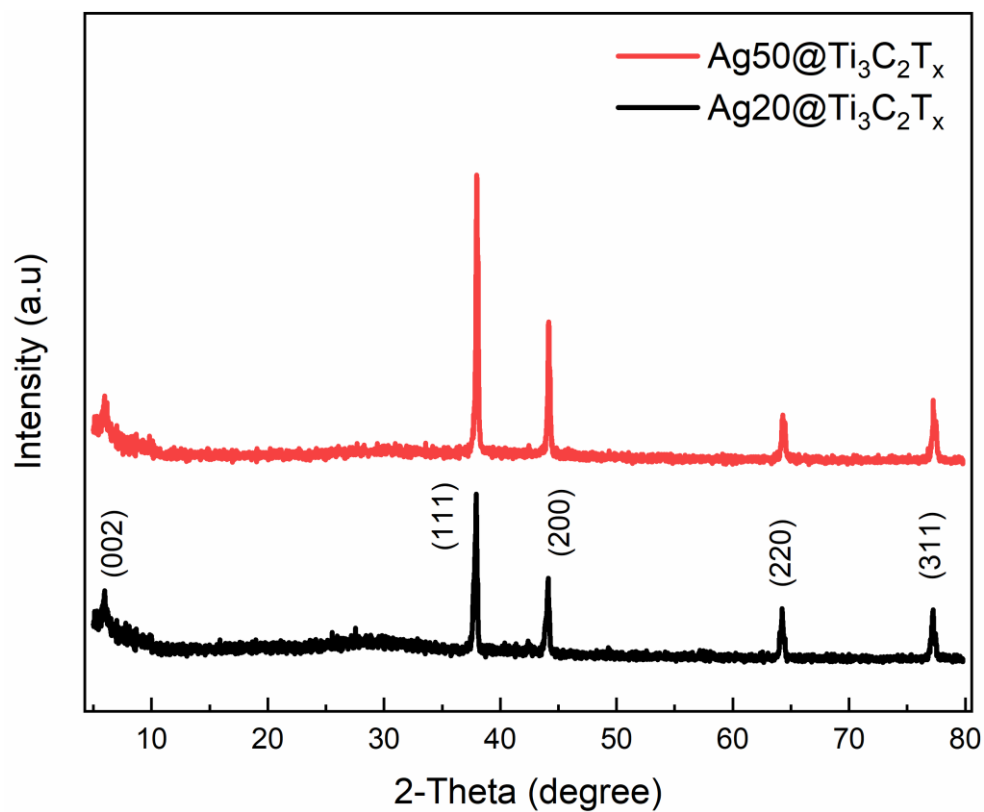

**Fig. S3** XRD pattern of Ag20@Ti<sub>3</sub>C<sub>2</sub>T<sub>x</sub> and Ag50@Ti<sub>3</sub>C<sub>2</sub>T<sub>x</sub> photocatalysts to check their stability after degradation experiments

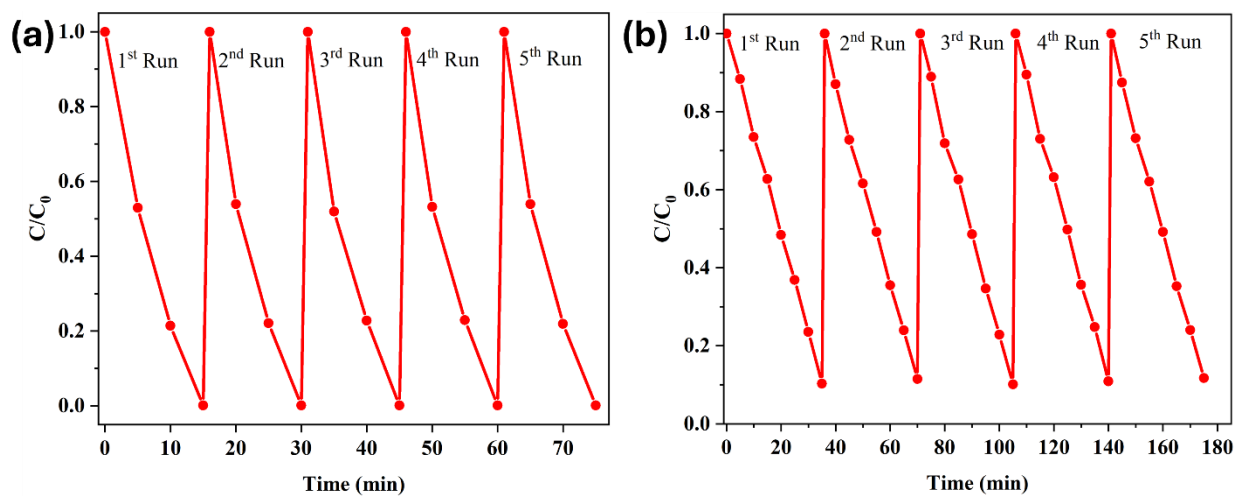

**Figure S4** (a) Reusability of Ag50@Ti<sub>3</sub>C<sub>2</sub>T<sub>x</sub> catalyst having 5 mg concentration (b) Reusability of Ag20@Ti<sub>3</sub>C<sub>2</sub>T<sub>x</sub> catalyst having 5 mg concentration
